# Supplementary material for: Formin-like 1 mediates effector T cell trafficking to inflammatory sites to enable T cell-mediated autoimmunity
Source: eLife journal article supplement (doi:10.7554/elife.58046), 2020-06-08
Supplement: supp [file elife-58046-supp-v1.zip]

Archive with 15 entries (15 files):
- elife_poa_e58046_Video_1.mp4
- elife_poa_e58046_Video_2.mp4
- elife_poa_e58046_Video_3.mp4
- elife_poa_e58046_Video_4.mp4
- elife_poa_e58046_Transparent_Reporting_File.pdf
- elife_poa_e58046_Figure_1_figure_supplement_1.pdf
- elife_poa_e58046_Figure_1_figure_supplement_2.pdf
- elife_poa_e58046_Figure_1_figure_supplement_3.pdf
- elife_poa_e58046_Figure_2_figure_supplement_1.pdf
- elife_poa_e58046_Figure_3_figure_supplement_1.pdf
- elife_poa_e58046_Figure_3_figure_supplement_2.pdf
- elife_poa_e58046_Figure_5_figure_supplement_1.pdf
- elife_poa_e58046_Figure_6_figure_supplement_1.pdf
- elife_poa_e58046_Figure_6_figure_supplement_2.pdf
- elife_poa_e58046_Figure_7_source_data_1.xlsx
