# Supplementary material for: Formin-like 1 mediates effector T cell trafficking to inflammatory sites to enable T cell-mediated autoimmunity
Source: eLife journal article supplement (doi:10.7554/elife.58046), 2020-06-08

Thompson et al. Figure 5 - figure supplement 1 “Immunofluorescent FMNL1 antibody staining is specific for FMNL1”

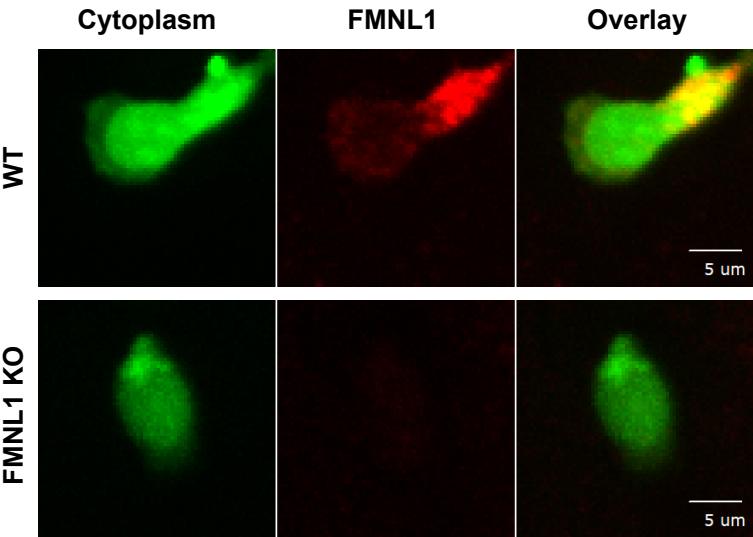

Supplement: supp [file elife-58046-supp-v1.zip › elife_poa_e58046_Figure_5_figure_supplement_1.pdf]
