# Supplementary material for: Formin-like 1 mediates effector T cell trafficking to inflammatory sites to enable T cell-mediated autoimmunity
Source: eLife journal article supplement (doi:10.7554/elife.58046), 2020-06-08
Supplement: supp [file elife-58046-supp-v1.zip › elife_poa_e58046_Figure_7_source_data_1.xlsx]

## Sheet: Sheet1
Thompson et al.
Source data for Figure 7D
	Control no constriction	Control in constriction	FMNL1 KO no constriction	FMNL1 KO in constriction
	1.01	1.35	1.14	1.34
	1.09	2.68	1.07	1.19
	0.89	0.98	1.04	0.83
	0.91	1.55	1.22	1.75
	0.95	1.1	0.69	0.82
	0.87	1.18	0.98	0.96
	1.07	1.32	1.34	1
	1.01	1.51	0.8	1.41
	0.84	1.55	1.19	0.78
	0.87	0.98	1.26	1.63
	0.83	1.51	1.33	0.67
	0.83	1.56	1.2	1.23
	0.87	1.29	1.1	1.79
	0.99	1.16	1.15	1.22
	0.99	1.19	0.96	1.23
	0.92	1.53	0.74	0.93
	0.84	1.31	0.98	0.83
	0.92	1.19	1.15	1.52
	0.93	1.88	1.11	0.87
	0.94	1.39	1	1.06
	0.79	0.97	0.92	1.01
	0.69	1.58	0.87	0.94
	1.48	1.33	0.96	1.06
	1	1.08	0.42	0.52
	1.04	0.82	1.04	0.72
	0.95	1.86	0.81	0.78
	1.14	1.55	0.83	0.79
	0.74	1.24	0.86	0.94
	1.71	1.79	0.93	0.87
	0.99	1.42	0.83	0.91
	0.71	0.92	0.7	0.83
	1.2	1.69	1.03	1.19
	0.59	1.08	0.56	0.82
	0.94	1.37	0.55	0.81
	1.29	0.85	0.96	1.16
	1.07	1.55
	0.85	1.16
	1.51	2.01
	0.94	1.19
	1.01	1.75
	0.91	1.2
	1.14	1.89
	1.11	1.47
	1.06	1.55
	0.75	1.48
	0.64	0.97
	0.83	1.08
