# Supplementary figures and images for: Formin-like 1 mediates effector T cell trafficking to inflammatory sites to enable T cell-mediated autoimmunity
Source: eLife journal article supplement (doi:10.7554/elife.58046), 2020-06-08

**A**

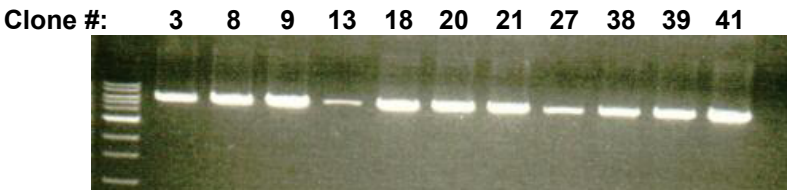

**B**

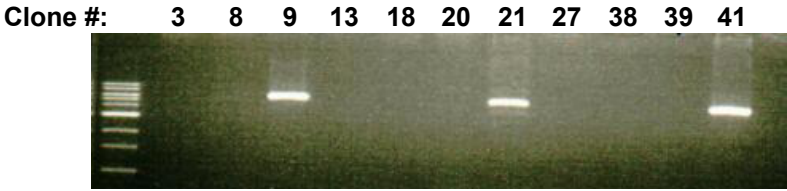

Supplement: supp [file elife-58046-supp-v1.zip › elife_poa_e58046_Figure_1_figure_supplement_1.pdf]

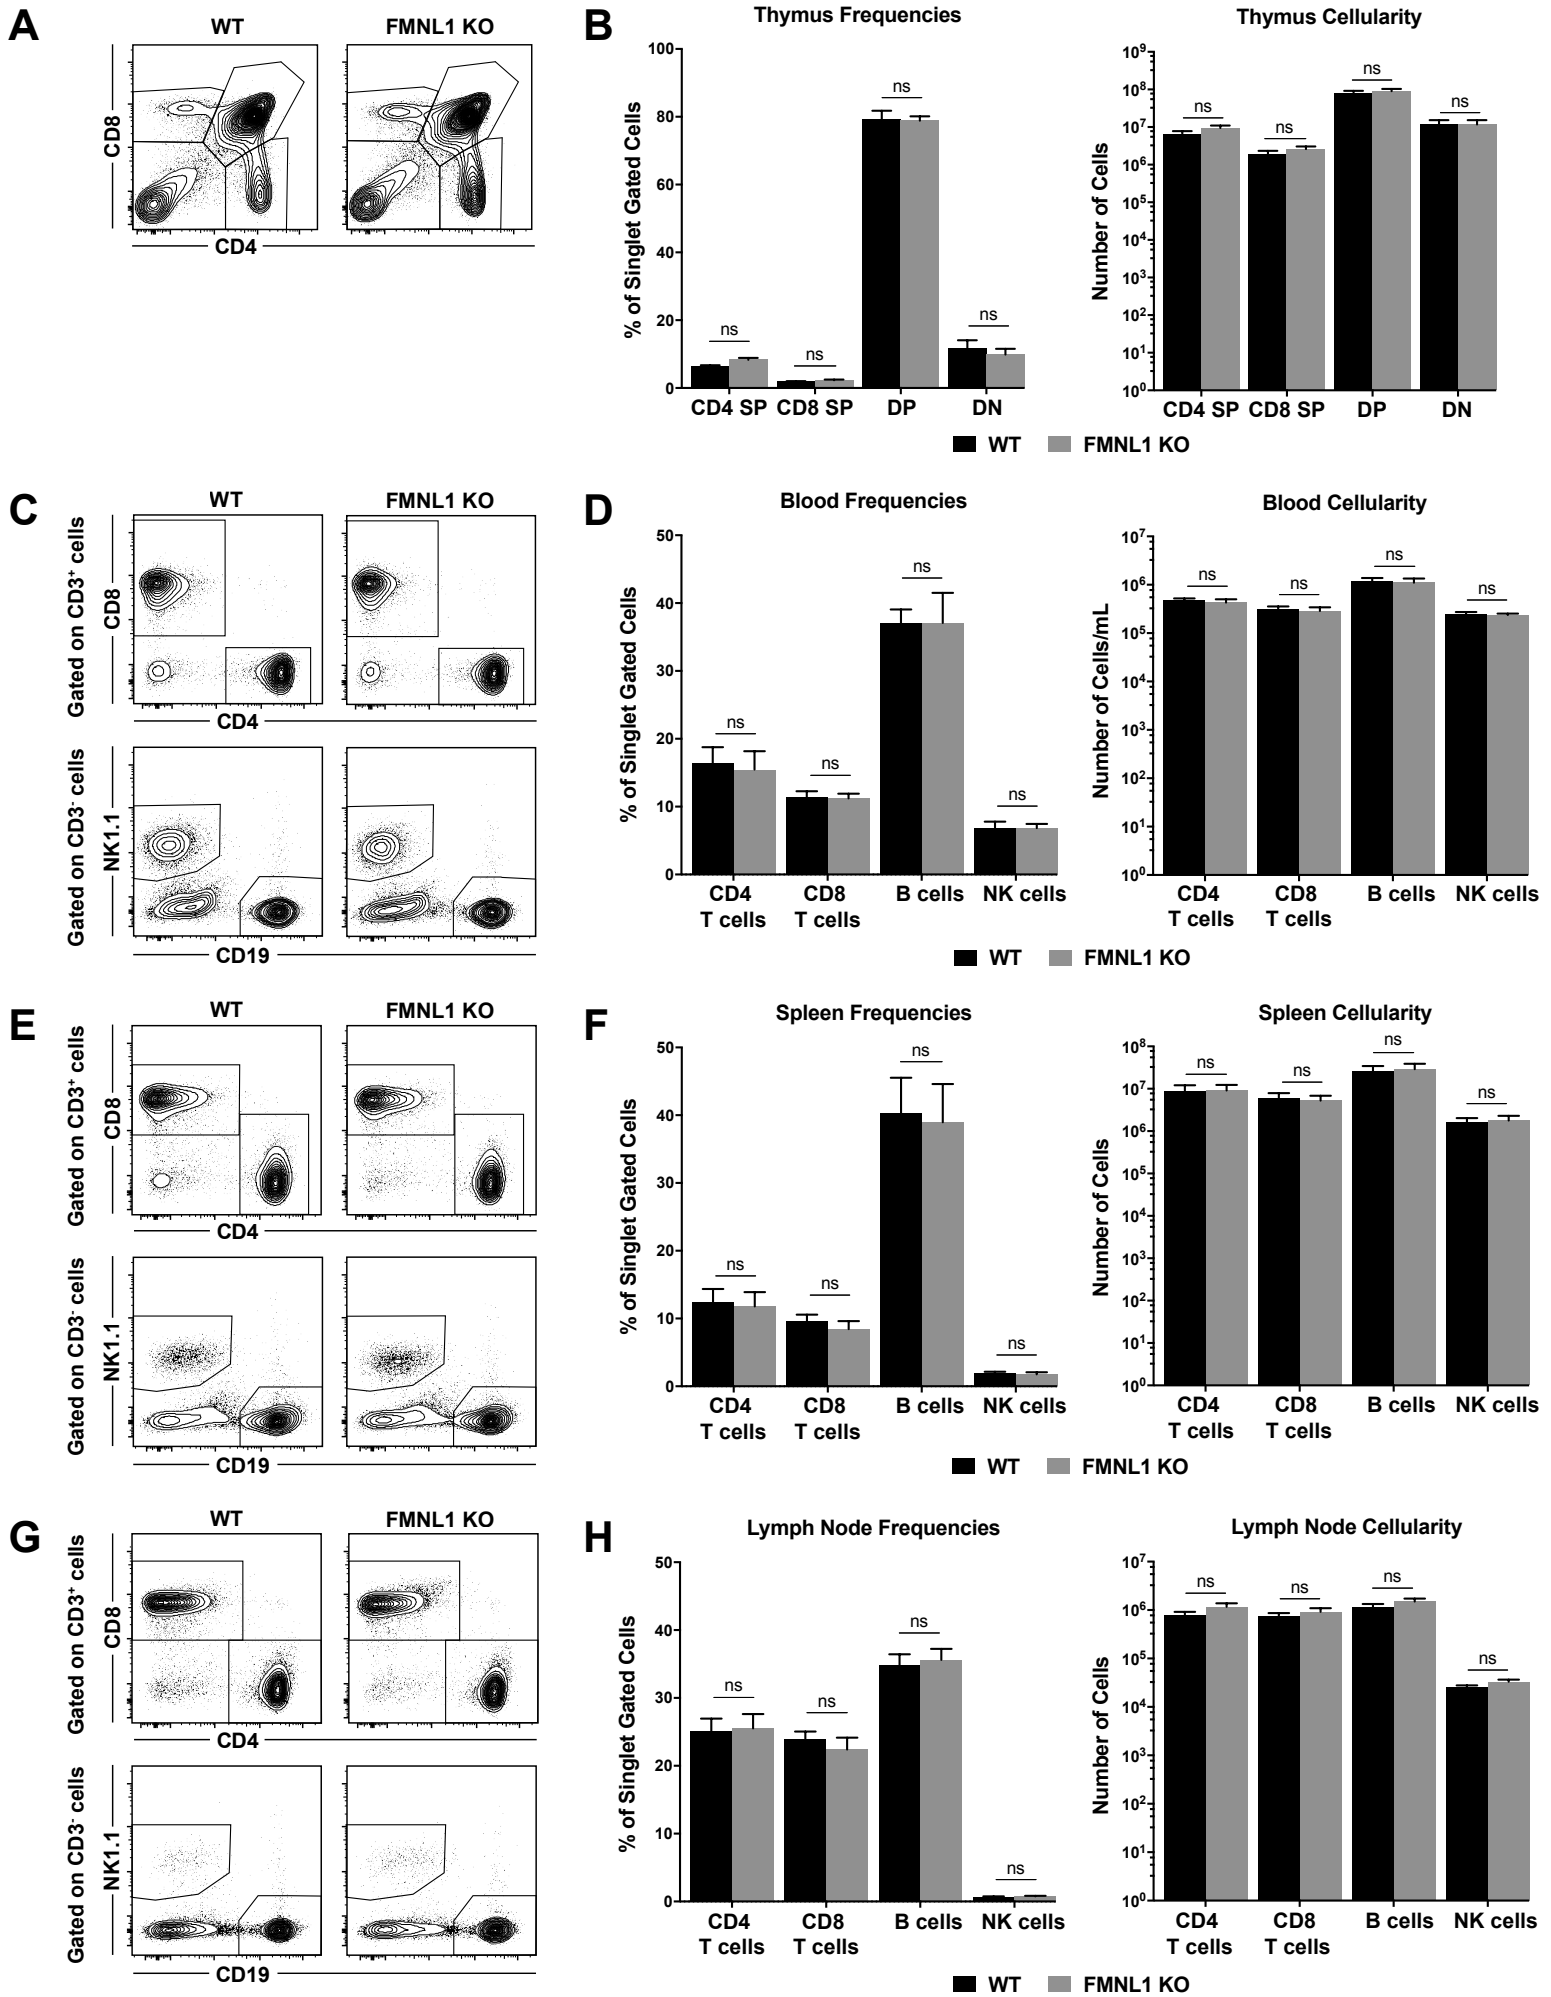

Supplement: supp [file elife-58046-supp-v1.zip › elife_poa_e58046_Figure_1_figure_supplement_2.pdf]

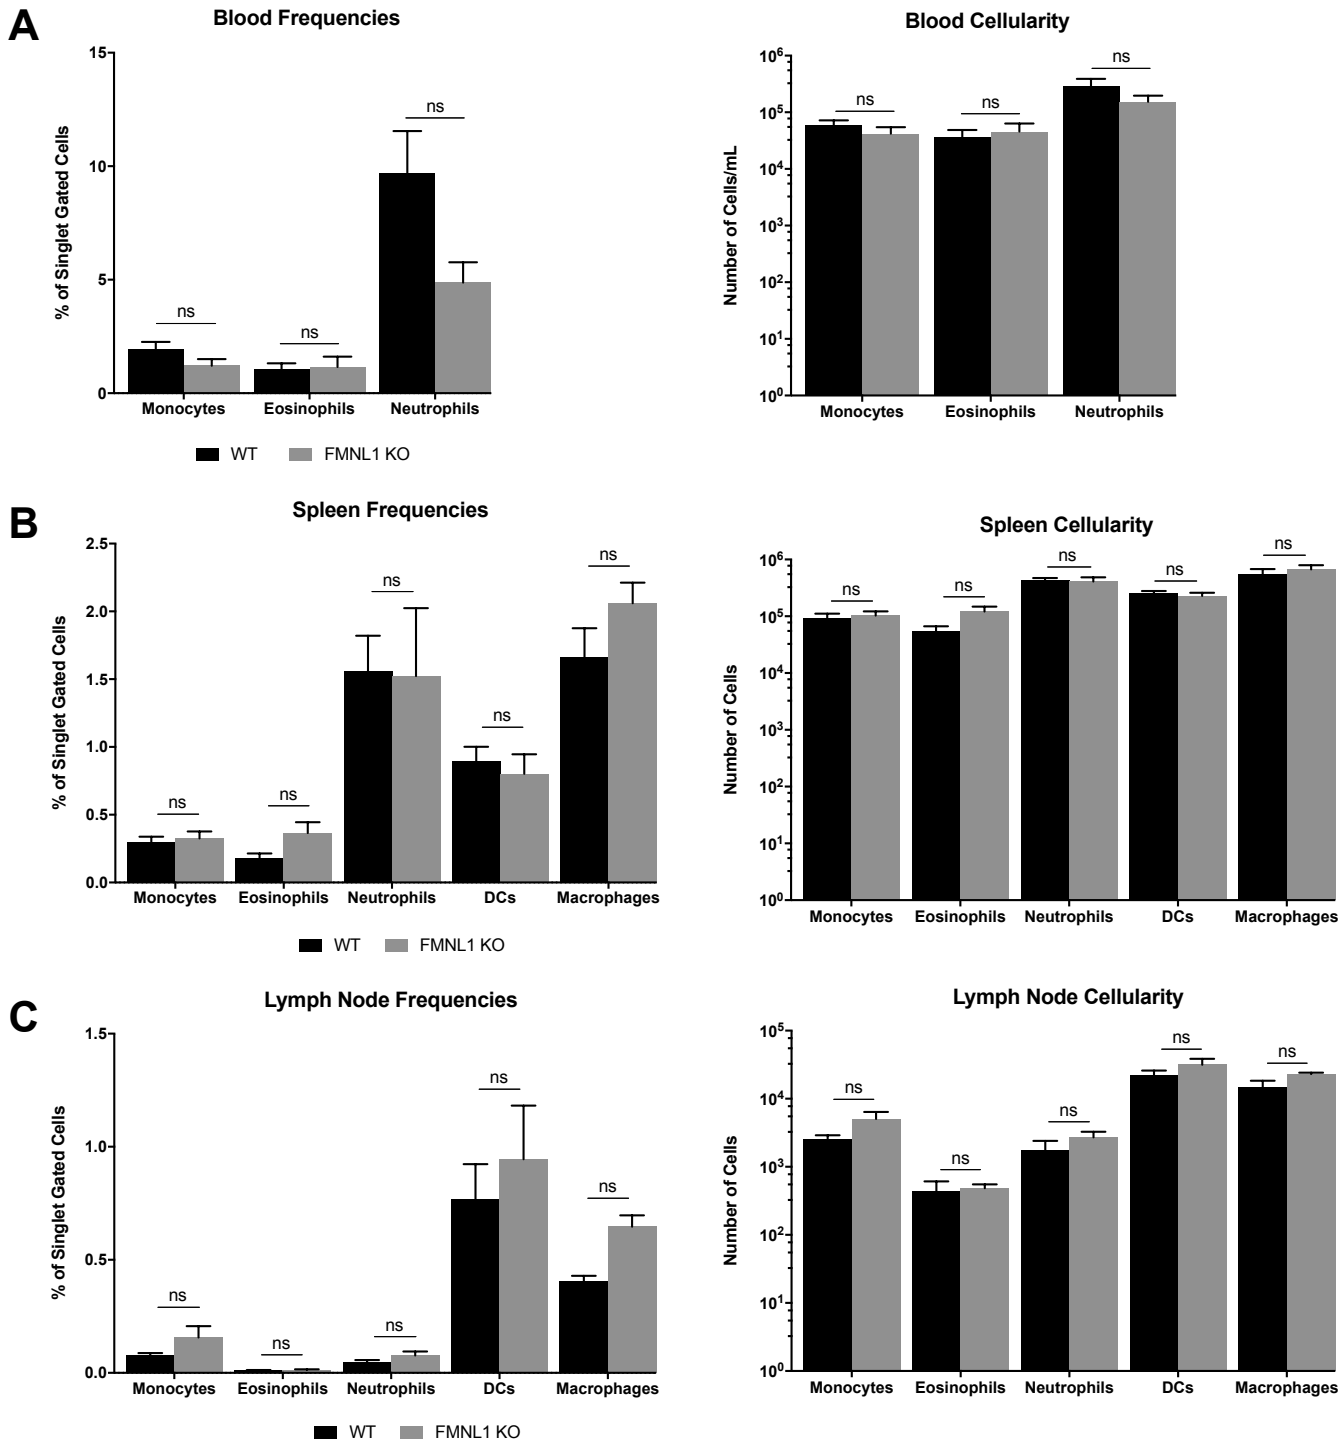

Supplement: supp [file elife-58046-supp-v1.zip › elife_poa_e58046_Figure_1_figure_supplement_3.pdf]

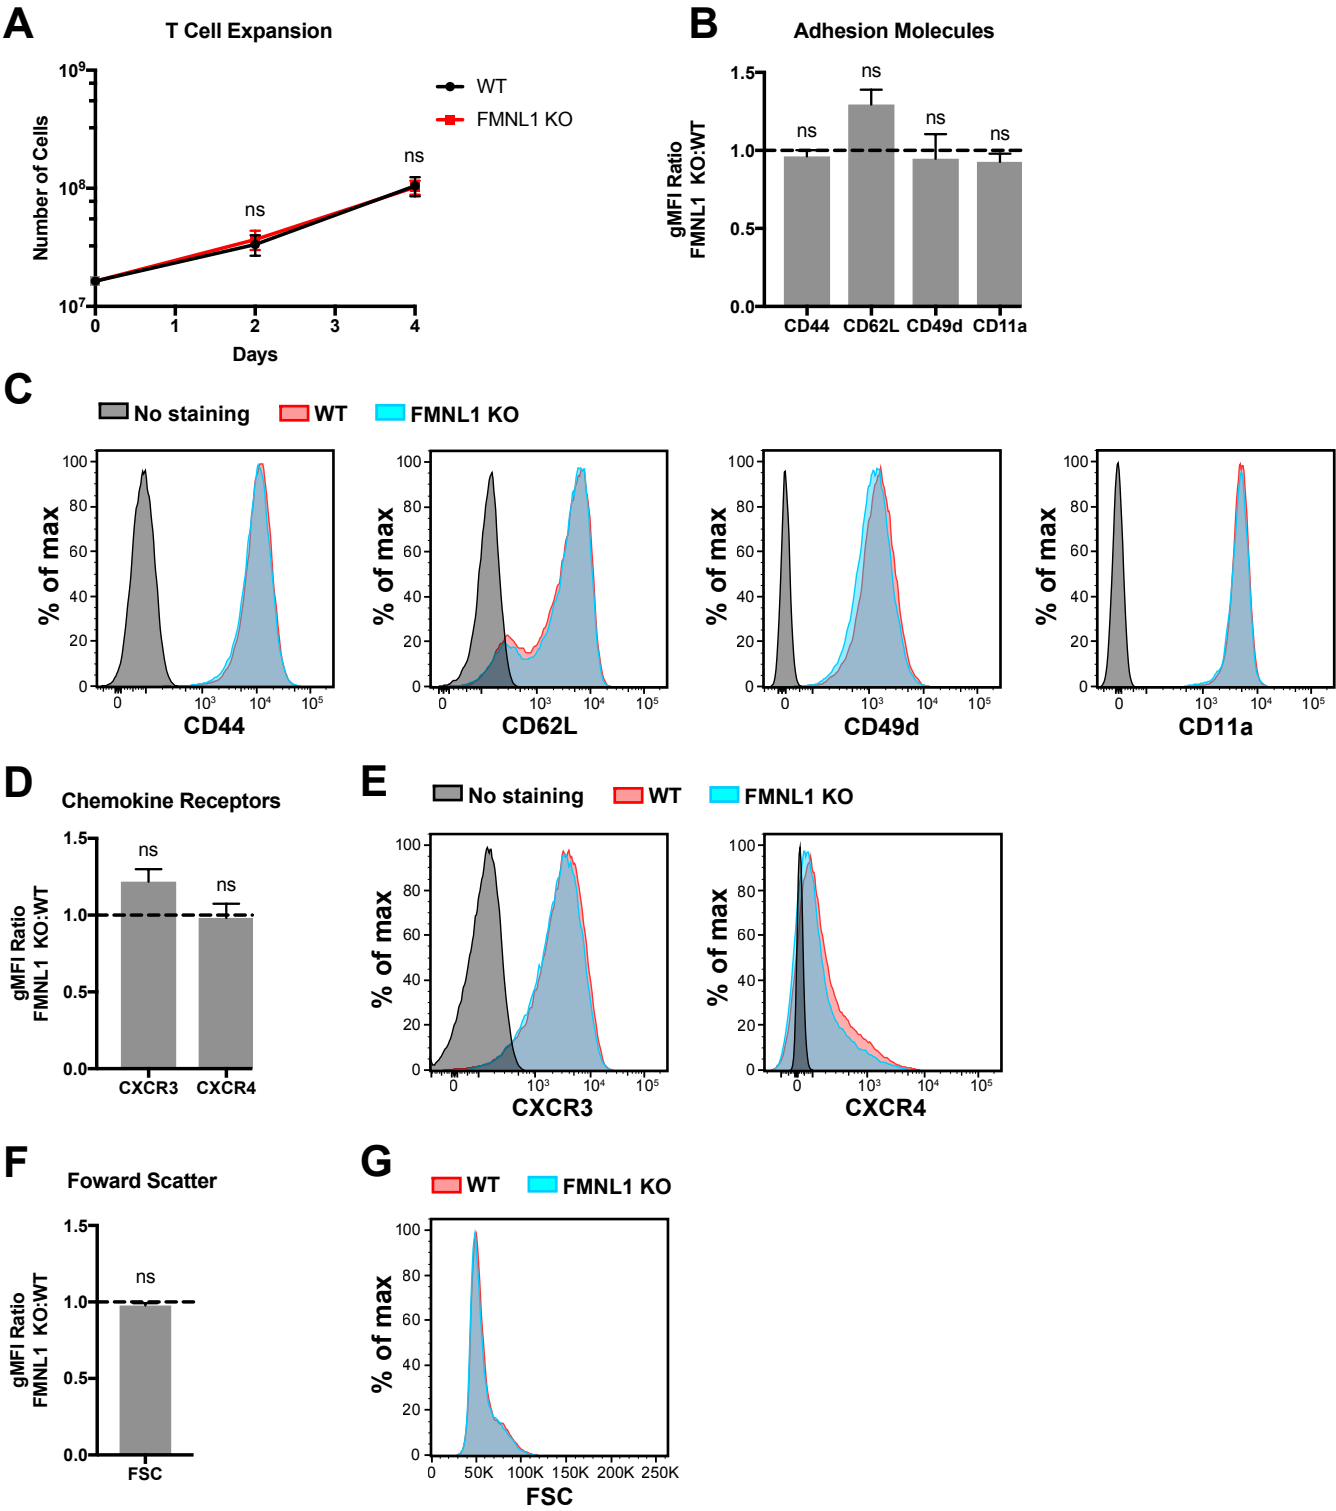

Supplement: supp [file elife-58046-supp-v1.zip › elife_poa_e58046_Figure_2_figure_supplement_1.pdf]

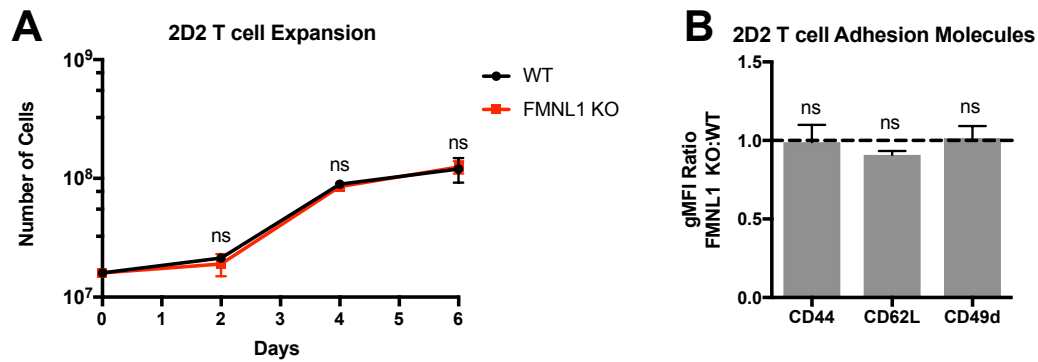

Supplement: supp [file elife-58046-supp-v1.zip › elife_poa_e58046_Figure_3_figure_supplement_1.pdf]

A

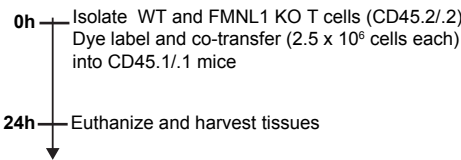

B

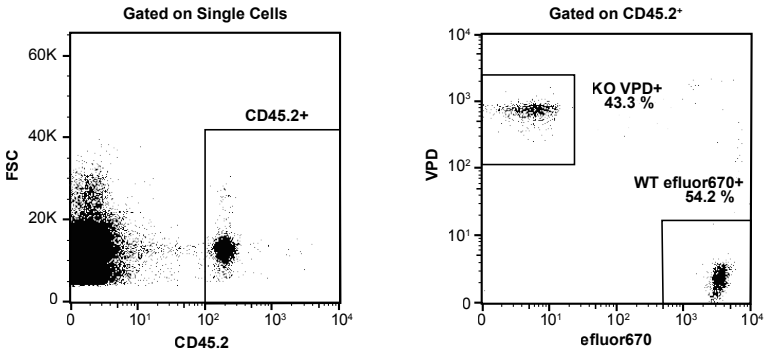

C

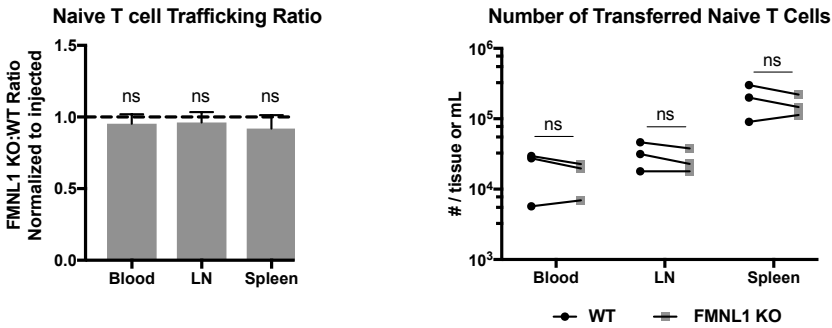

D

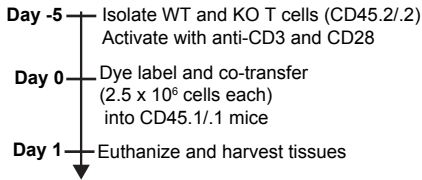

E Activated T cell Trafficking Ratio

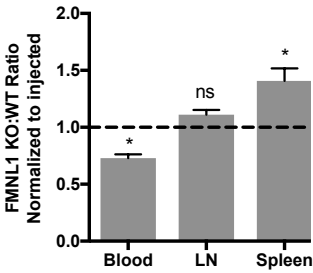

Number of Transferred Activated T Cells

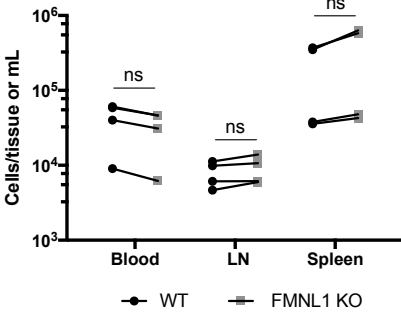

Supplement: supp [file elife-58046-supp-v1.zip › elife_poa_e58046_Figure_3_figure_supplement_2.pdf]

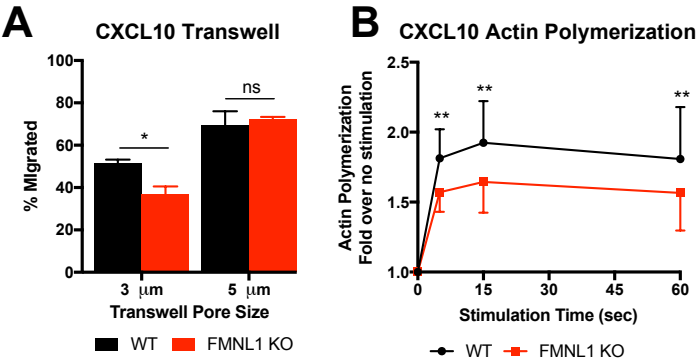

Supplement: supp [file elife-58046-supp-v1.zip › elife_poa_e58046_Figure_6_figure_supplement_1.pdf]

Thompson et al. Figure 6 - figure supplement 2 “Re-expression of FMNL1 in KO cells”

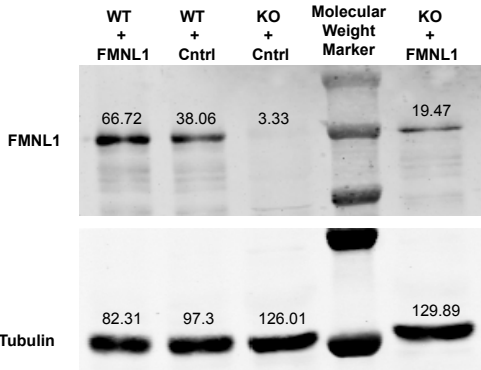

Supplement: supp [file elife-58046-supp-v1.zip › elife_poa_e58046_Figure_6_figure_supplement_2.pdf]

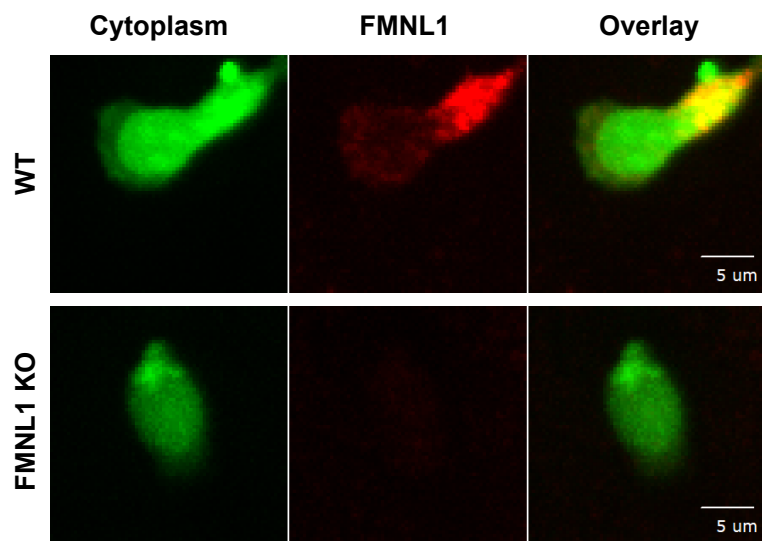

Supplement: supp [file elife_poa_e58046_Figure_5_figure_supplement_1.pdf › elife_poa_e58046_Figure_5_figure_supplement_1.pdf]
